# Supplementary material
Source: publisher figshare collection journal article supplement (https://springernature.figshare.com/ndownloader/files/22332150)
Supplement: Supplementary file 1 [file 22332150]

## Sheet: 厚さ
	Additional file 4 Raw data of thickness of laterite blocks used for the bridge construction along the East Royal Road
		Bridge No. along the East Royal Road																									Temple (Angkor monuments)
		2494	3708	3706	213	7397	7081	2495	2496	3705	3707	1600	3701	1599	225	319	318	2498	3703	3702	305	1974	5426	1025	2695	466	Angkor Thom	Prasat Suor Prat	Beanteay Samre	Beanteay Samre	Chau Say Tevoda	Ta Prohm	Beanteay Kdei	Thommanon	Chau Say Tevoda	Angkor Wat
																											Outer Enclosure	S2&N3 Towers	Outer Enclosure	Inner Enclosure	Outer Enclosure	Inner Enclosure	Inner Enclosure	Enclosure	Foundation	Outer Enclosure
	Thickness (cm)	35	28	35	31	29	34	31	28	24	31	33	30	34	34	37	27	32	42	26	31	35	37	35	33	30	30.5	41	39	33	21	33	40	30	N/A	36	29	34
		38	29	35	29	26	41	29	25	26	32	33	28	41	31	34	29	25	33	25	24	39	26	38	22	22	33.5	50	41	31	19	40	39	32		38	35	33
		40	29	34	27	29	35	30	29	32	31	32	31	38	30	33	37	30	39	31	27	21	22	30	30	29	32	37	42	31	22	32	39	34		38	35	31
		30	24	36	28	34	36	28	32	26	30	34	24	38	33	36	28	34	30	33	26	32	37	23	28	31	36.5	47	42	33	21	29	40	34		32	35	35
		35	29	35	27	34	33	28	23	29	29	34	28	38	33	33	31	29	36	29	23	29	34	36		28	32	44	43	34	19	31	41	32		37	37	31
		37	28	35	29	33	38	23	30	33	30	34	29	32	34	38	29	29	32	32	30	30	39	41		26	30.5	31.5	39	31	22	32	42	30		42	35	33
		37	30	35	37	31	38	31	29	28	28	31	33	33	34	34	32	27	39	20	30	36	40	27		31	30	45.5	42	32	20	35	41	33		37	37	31
		41	29	36	29	28	32	25	26	31	25	33	32	37	30	39	30	30	34	31	27	30	35	36		30	24.5	40	39	31	18	32	36	31		38	33	38
		37	28	33	29	28	34	30	30	27	29	36	27	33	22	33	38	27	35	26	30	31	33	33		33	30	40.5	44	37	23	33	37	32		44	38	35
		38	26	31	30	31	34	30	29	25	30	35	32	40	19	35	30	26	34	28	29	29	30	29		29	26.5	43	38	31	20	29	38	32		38	37	33
		38	30	32	32	32	35	29	25		24	38	28	34	32	34	26	31	35	32	23	28	36	35			29.5	45.5	40	34	29	35	33	27		35	35	36
		31	29	33	26	33	32	33	29		32	35	21	36	31	32	38	26	36	35	27	32	36	33			33	40	40	30	25	32	25	27		38	33	29
		34	28	32	32	34		32	25		32	31	34	37	40	37	31	28	40	31	27	35	28	29			29.5	43.5	39	33	28	33	23	26		43	37	25
		35	24	35	27	30		26	24		35	34	30	33	33	31	30	31	35	33	24	30	36	28			28	44	34	31	28	38	36	30		32	49	35
		36	24	31	28	29		32	28		27	34	33	35	27	29	29	25	34	23	28	30	25	28			31	40.5	37	34	28	33	31	26		34	35	33
		36	24	33	27	35		31	25		29	38	28	37	35	34	31	28	33	32	30	30	38	25			35	45	46	31	29	35	23	32		33	34
		34	28	32	32	40		35	27		32	42	23	33	32	33	28	25	37	34	30	30	39	25			34.5	39	40	33	28	32	30	26		32	38
		40	27	35	30	31		31	23		24	34	29	34	27	32	34	27	38	37	28	29	35	26			32.5	40.5	40	35	28	31	27	28		35	35
		35	33	32	28	33		31	32		21	36	29	28	39	35	34	27	35	36	25	31	40	30			30	40	49	32	30	36	29	31		31	38
		42	28	35	29	30		26	31		28	35	26	27	30	32	32	38	40	30	27	33	37	27			29	43	42	33	30	37	30	29		32	39
	mean	36.45	27.75	33.75	29.35	31.5	35.1667	29.55	27.5	28.1	28.95	34.6	28.75	34.9	31.3	34.05	31.2	28.75	35.85	30.2	27.3	31	34.15	30.7	28.25	28.9	30.9	42.025	40.8	32.5	24.4	33.4	34	30.1	-	35.2909
	median	36.5	28	34.5	29	31	34.5	30	28	27.5	29.5	34	29	34.5	32	34	30.5	28	35	31	27	30	36	29.5	29	29.5	30.5	42	40	32.5	24	33	36	30.5	-	35
	s.d.*	3.05175	2.35919	1.65036	2.53969	3.15394	2.69118	2.89237	2.8562	3.07137	3.39466	2.56289	3.41629	3.5674	4.92149	2.45967	3.45802	3.30669	3.0483	4.40813	2.51522	3.65629	5.23425	4.91078	4.64579	3.07137	2.86816	3.96523	3.23793	1.73205	4.25997	2.83586	6.30789	2.6537	-	3.8762
	*Standard deviation
